# Supplementary material for: Use of the Bacterial Lysate OM-85 in the Paediatric Population in Italy: A Retrospective Cohort Study
Source: MDPI journal article supplement (doi:10.3390/ijerph18136871), 2021-06-26
Supplement: s1 [file s1]

## **Supplementary material**

### **Tables**

Table S1. ICD9-CM diagnosis codes used for classification.

Table S2. OM-85 prescription patterns in 1091 children included. Pedianet 2007-2017.

Table S3. Antibiotic prescriptions frequency in 221 children with recurrent RTI included in the PRE and POST period. Pedianet, 2007-2017.

Table S4. Antibiotic prescriptions pattern in 221 children with recurrent RTI included in the PRE and POST period. Pedianet, 2007-2017.

Table S5. RTI frequency in 221 children with recurrent RTI included in the PRE and POST period. Pedianet, 2007-2017.

Table S6. Antibiotic prescriptions frequency in the PRE and POST period by sex. Pedianet, 2007-2017.

Table S7. RTI frequency in the PRE and POST period by sex. Pedianet, 2007-2017.

Table S1. ICD9-CM diagnosis codes used for classification.

| <b>Diagnosis</b>                         | <b>ICD9-CM code</b>                                                                                                                                                                                                                                                                                    |
|------------------------------------------|--------------------------------------------------------------------------------------------------------------------------------------------------------------------------------------------------------------------------------------------------------------------------------------------------------|
| <b>Pneumonia</b>                         | 481 Pneumococcal pneumonia [Streptococcus pneumoniae pneumonia],<br>482 Other bacterial pneumonia<br>483 Pneumonia due to other specified organism<br>484 Pneumonia in infectious diseases classified elsewhere,<br>485 Bronchopneumonia, organism unspecified,<br>486 Pneumonia, organism unspecified |
| <b>Pharyngitis</b>                       | 462 Acute pharyngitis<br>463 Acute tonsillitis,<br>034 Streptococcal sore throat and scarlet fever                                                                                                                                                                                                     |
| <b>Sinusitis</b>                         | 461 Acute sinusitis<br>473 Chronic sinusitis                                                                                                                                                                                                                                                           |
| <b>Suppurative otitis media</b>          | 382 Suppurative and unspecified otitis media                                                                                                                                                                                                                                                           |
| <b>Non-suppurative otitis media</b>      | 381: Non-suppurative otitis media and Eustachian tube disorders                                                                                                                                                                                                                                        |
| <b>Upper respiratory tract infection</b> | 464 Laryngitis- tracheitis<br>460.x Upper respiratory tract infection                                                                                                                                                                                                                                  |
| <b>Lower respiratory tract infection</b> | 490 Acute bronchitis<br>466 Bronchiolitis<br>491 Chronic bronchitis                                                                                                                                                                                                                                    |

Table S2. OM-85 prescription patterns in 1091 children included. Pedianet 2007-2017.

|                                 | <b>N</b> | <b>(%)</b> |
|---------------------------------|----------|------------|
| <b># of OM-85 prescriptions</b> |          |            |
| 1                               | 876      | 80.29      |
| 2                               | 159      | 14.57      |
| 3                               | 36       | 3.3        |
| ≥4                              | 20       | 1.83       |

Table S3. Antibiotic prescriptions frequency in 221 children with recurrent RTI included in the PRE and POST period. Pedianet, 2007-2017.

| <b># of antibiotic prescriptions</b> | <b>PRE</b> |            | <b>POST</b> |            | <b>p-value*</b> |
|--------------------------------------|------------|------------|-------------|------------|-----------------|
|                                      | <b>N</b>   | <b>(%)</b> | <b>N</b>    | <b>(%)</b> |                 |
| Mean (SD)                            | 4.1        | (1.3)      | 2.9         | (1.7)      | < 0.0001        |
| 0                                    | 5          | (2.4)      | 24          | (11.4)     |                 |
| 1                                    | 8          | (3.8)      | 33          | (15.6)     |                 |
| 2                                    | 14         | (6.6)      | 34          | (16.1)     |                 |
| 3                                    | 33         | (15.6)     | 34          | (16.1)     |                 |
| 4                                    | 25         | (11.9)     | 29          | (13.7)     |                 |
| ≥ 5                                  | 126        | (59.7)     | 57          | (27)       |                 |

\* Post-hoc test

Table S4. Antibiotic prescriptions pattern in 221 children with recurrent RTI included in the PRE and POST period. Pedianet, 2007-2017.

| Antibiotic class       | PRE  |         | POST |         | p-value* |
|------------------------|------|---------|------|---------|----------|
|                        | N    | (%)     | N    | (%)     |          |
| Co-amoxiclav           | 315  | (27.02) | 205  | (26.32) | 0.6134   |
| Amoxicillin            | 297  | (25.47) | 194  | (24.9)  |          |
| Macrolides             | 206  | (17.67) | 126  | (16.18) |          |
| III gen cephalosporins | 186  | (15.95) | 131  | (16.81) |          |
| II gen cephalosporins  | 107  | (9.18)  | 84   | (10.79) |          |
| Clofoctol              | 14   | (1.2)   | 16   | (2.05)  |          |
| Tiamphenicole          | 21   | (1.8)   | 14   | (1.8)   |          |
| Others                 | 20   | (1.71)  | 9    | (1.17)  |          |
| Total                  | 1166 |         | 779  |         |          |

\* Chi-square test

Table S5. RTI frequency in 221 children with recurrent RTI included in the PRE and POST period.

Pedianet, 2007-2017.

| # of RTI   | PRE  |         | POST |         | p-value* |
|------------|------|---------|------|---------|----------|
|            | N    | %       | N    | %       |          |
| Mean (std) | 8.17 | (2.47)  | 4.48 | (3.39)  | < 0.0001 |
| ≤5         | -    | -       | 153  | (72.51) |          |
| 6          | 59   | (27.96) | 16   | (7.58)  |          |
| 7          | 51   | (24.17) | 7    | (3.32)  |          |
| 8          | 34   | (16.11) | 10   | (4.74)  |          |
| ≥9         | 67   | (31.76) | 25   | (11.84) |          |

\* Post-hot test

Table S6. Antibiotic prescriptions frequency in the PRE and POST period by sex. Pedianet, 2007-2017.

|            | Male     |        |     |        | Female   |        |     |        |
|------------|----------|--------|-----|--------|----------|--------|-----|--------|
| Mean (std) | 2.5      | (1.8)  | 1.9 | (1.7)  | 2.3      | (1.8)  | 1.8 | (1.7)  |
| 0          | 109      | (18.8) | 141 | (24.4) | 105      | (20.5) | 143 | (27.9) |
| 1          | 101      | (17.4) | 142 | (24.5) | 91       | (17.8) | 129 | (25.2) |
| 2          | 94       | (16.2) | 106 | (18.3) | 97       | (19)   | 82  | (16)   |
| 3          | 75       | (13)   | 72  | (12.4) | 70       | (13.7) | 51  | (10)   |
| 4          | 73       | (12.6) | 44  | (7.6)  | 46       | (9)    | 37  | (7.2)  |
| ≥5         | 127      | (21.9) | 74  | (12.8) | 103      | (20.1) | 70  | (13.7) |
| p-value    | < 0.0001 |        |     |        | < 0.0001 |        |     |        |

Table S7. RTI frequency in the PRE and POST period by sex. Pedianet, 2007-2017.

|            | Male     |        |     |        | Female   |        |     |        |
|------------|----------|--------|-----|--------|----------|--------|-----|--------|
| Mean (std) | 2.9      | (1.8)  | 2.3 | (1.7)  | 2.7      | (1.7)  | 2.1 | (1.7)  |
| 0          | 70       | (12.1) | 107 | (18.5) | 65       | (12.7) | 107 | (20.9) |
| 1          | 93       | (16.1) | 127 | (21.9) | 89       | (17.4) | 127 | (24.8) |
| 2          | 70       | (12.1) | 105 | (18.1) | 84       | (16.4) | 87  | (17)   |
| 3          | 104      | (18)   | 82  | (14.2) | 85       | (16.6) | 69  | (13.5) |
| 4          | 60       | (10.4) | 60  | (10.4) | 62       | (12.1) | 47  | (9.2)  |
| ≥5         | 182      | (31.4) | 98  | (16.9) | 127      | (24.8) | 75  | (14.7) |
| p-value    | < 0.0001 |        |     |        | < 0.0001 |        |     |        |
